# Supplementary material for: Long-life Na-rich nickel hexacyanoferrate capable of working under stringent conditions
Source: Royal Society of Chemistry journal article supplement (doi:10.1039/d1ta05998j), 2021-01-01
Supplement: d1ta05998j1.pdf [file d1ta05998j1.pdf]

## Supporting Information

### Long-life Na-rich nickel hexacyanoferrate capable of working under stringent conditions

Yunpo Sun,<sup>a</sup> Yunli Xu,<sup>b</sup> Zheng Xu,<sup>a</sup> Yu Sun,<sup>a</sup> Xiongwen Xu,<sup>c</sup> Jian Tu,<sup>c</sup> Jian Xie,<sup>\*a</sup> Shuangyu

Liu<sup>d</sup> and Xinbing Zhao<sup>a</sup>

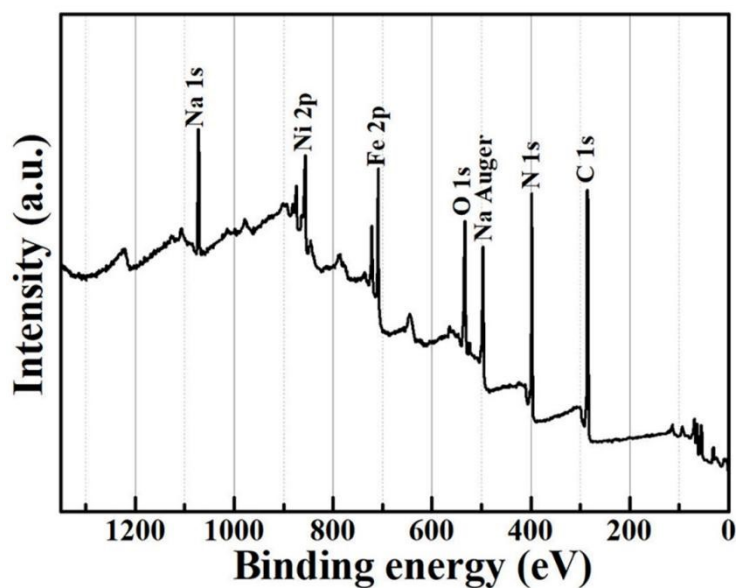

Fig. S1 XPS survey spectrum of NiHCF sample.

<sup>a</sup> State Key Laboratory of Silicon Materials, School of Materials Science and Engineering, Zhejiang University, Hangzhou 310027, P. R. China. E-mail: xiejian1977@zju.edu.cn; Fax: +86-571-87951451; Tel: +86-571-87952181

<sup>b</sup> Zhejiang Research Institute of Product Quality and Safety, Hangzhou 310018, P. R. China

<sup>c</sup> LI-FUN Technology Corporation Limited, Zhuzhou 412000, P. R. China

<sup>d</sup> Zhejiang Huayun Information Technology Co., Ltd, Hangzhou 310008, P. R. China

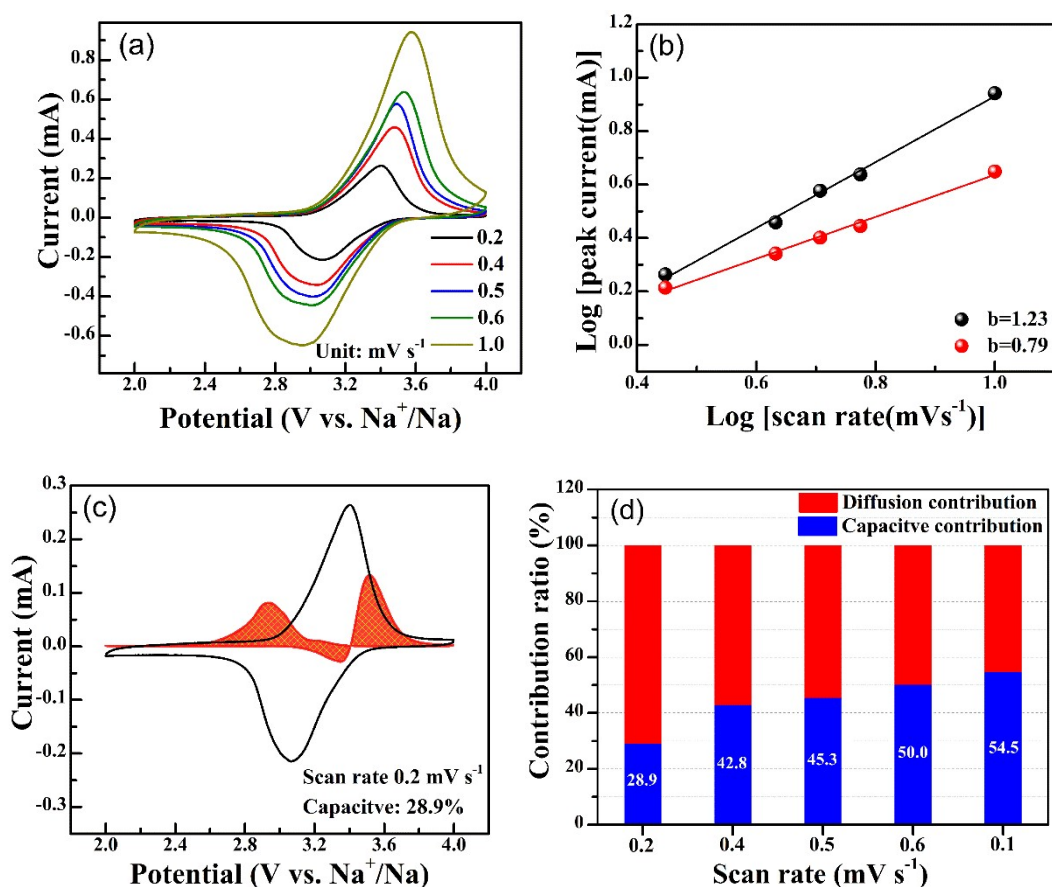

**Fig. S2** (a) CV curves at various scan rate, (b) peak current at various scan rates, (c) capacitive contributions to Na storage scanned at 0.2 mV s<sup>-1</sup> and (d) capacitive contributions at various scan rates of NiHCF.

CV scanning was conducted from 0.2 to 1 mV s<sup>-1</sup>. The pseudocapacitive contribution can be obtained by equation:  $i(V) = k_1v + k_2v^{0.5}$  using Bruce Dunn's method (Ref 57). Where  $i$  is the measured current,  $v$  is the scan rate, and  $k_1v$  and  $k_2v^{0.5}$  describe the surface-controlled and diffusion-controlled processes, respectively. The pseudocapacitive contribution at 0.2 mV s<sup>-1</sup> is calculated to be 28.9%.

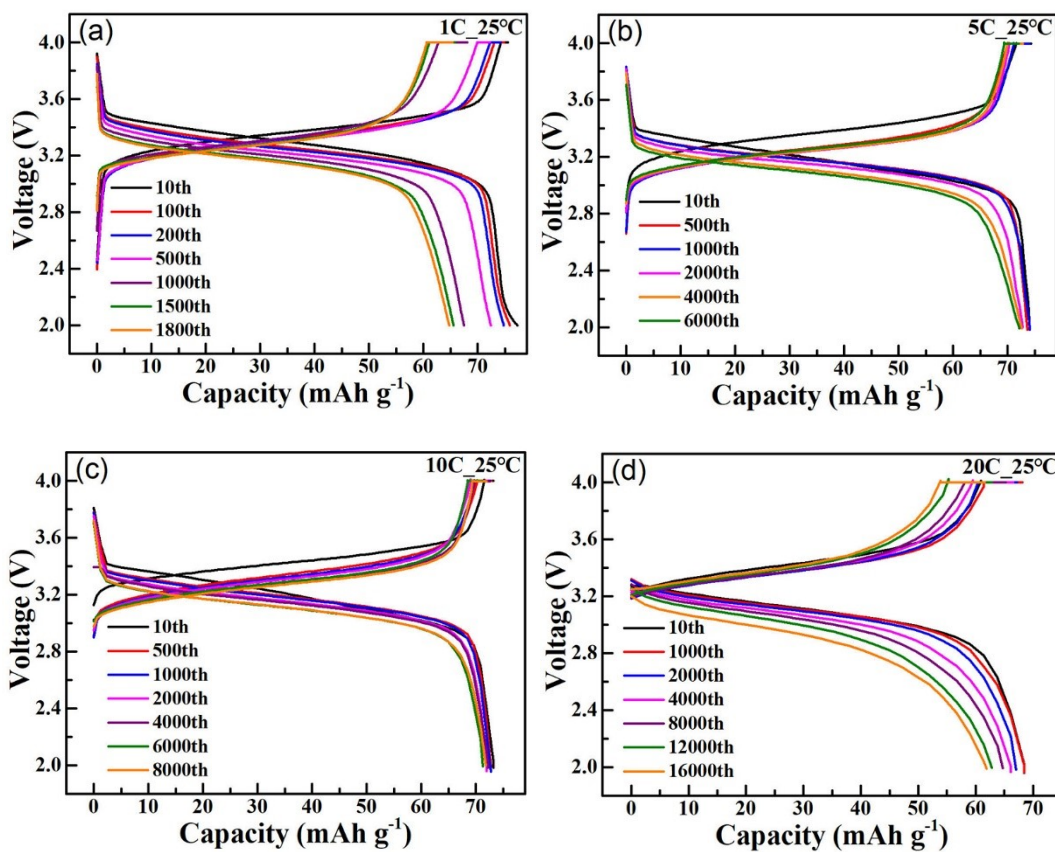

**Fig. S3** Voltage profiles of NiHCF at 25°C at various discharge rates of (a) 1 C, (b) 5 C, (c) 10 C, and (d) 20 C.

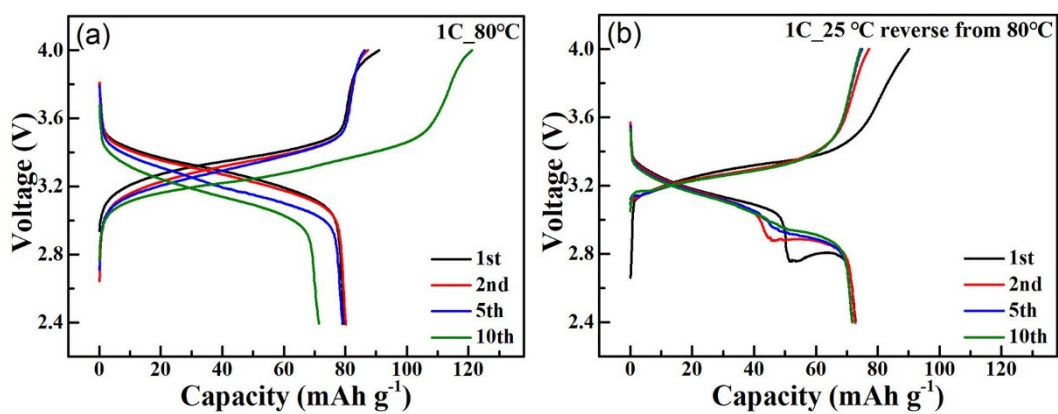

**Fig. S4** (a) Voltage profiles at 80°C and (b) voltage profiles at 25°C after recovery from 80°C of NiHCF at 1 C.

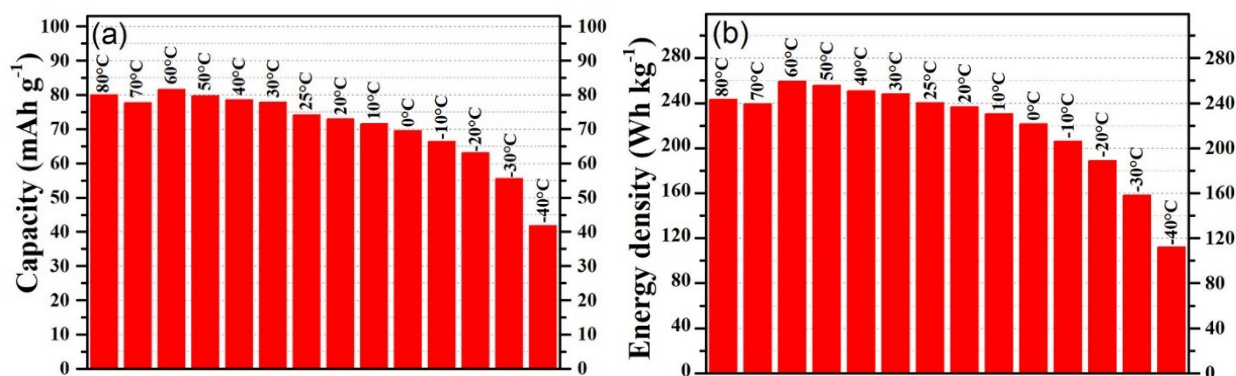

**Fig. S5** Comparison of (a) discharge capacity and (b) energy density (based on NiHCF material only) at 1 C of NiHCF from  $-40^{\circ}\text{C}$  to  $80^{\circ}\text{C}$ .

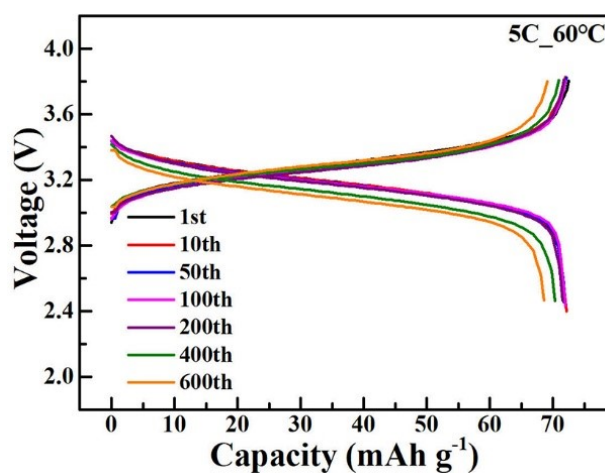

**Fig. S6** Voltage profiles of NiHCF at  $60^{\circ}\text{C}$  cycled at 5 C.

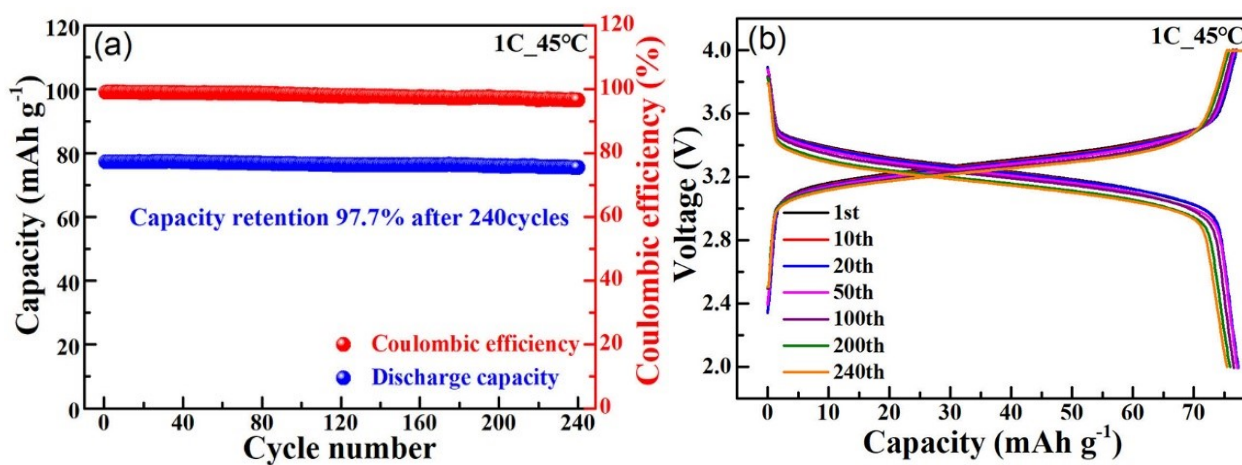

**Fig. S7** (a) Cycling performance and (b) voltage profiles of NiHCF at  $45^{\circ}\text{C}$  at 1 C.

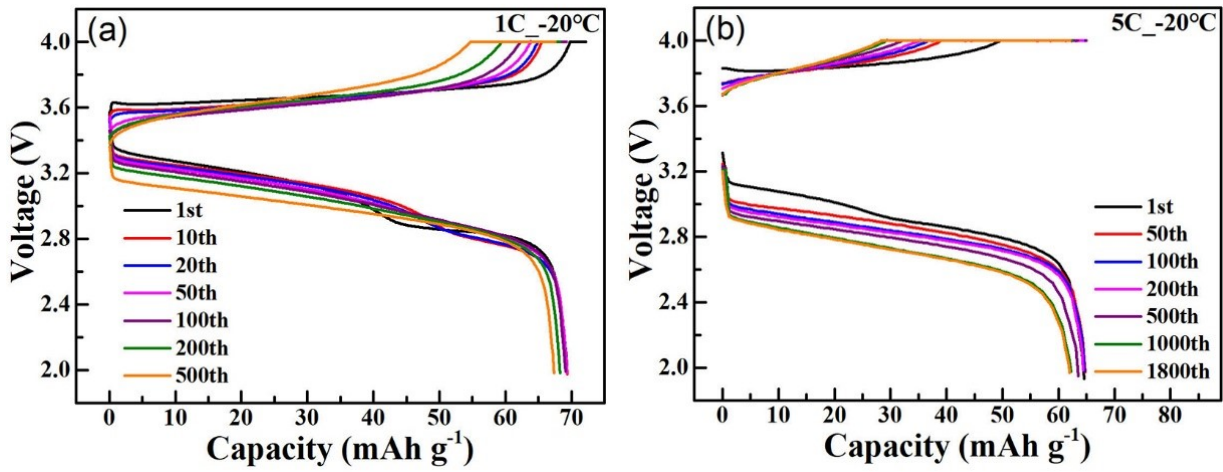

Fig. S8 Voltage profiles of NiHCF at  $-20^{\circ}\text{C}$  cycled at (a) 1 C and (b) 5 C.

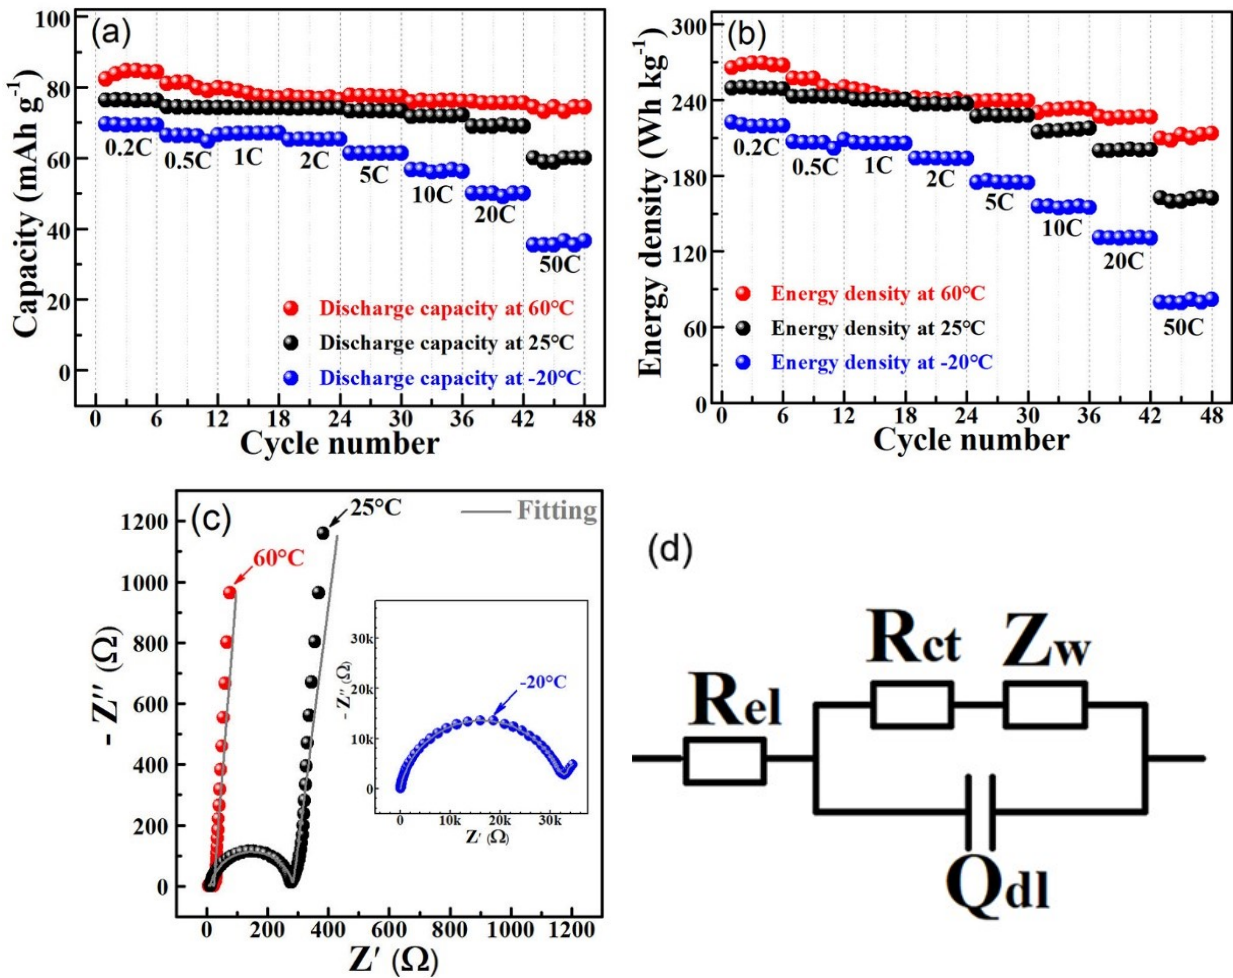

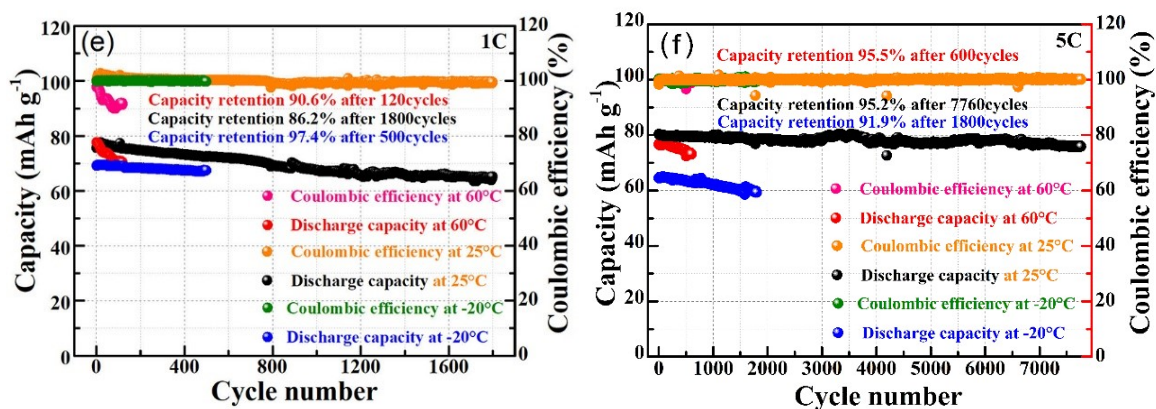

**Fig. S9** Comparison of (a) rate capability, (b) energy density, and (c) EIS of NiHCF at 60°C, 25°C and -20°C, (d) equivalent circuit for EIS fitting, and comparison of cycling stability of NiHCF at 60°C, 25°C and -20°C at current rate of (e) 1 C and (f) 5 C.

To further understand the electrochemical behaviors of NiHCF, EIS measurements were performed at 60°C, 25°C and -20°C as shown in Fig. S9c. The impedance spectra are all composed of small semicircles in the high frequency region, which represents the charge transfer resistance ( $R_{ct}$ ), and straight lines in the low frequency region, which corresponds to the Na<sup>+</sup> diffusion in the bulk material. The  $R_{ct}$  value at 25°C (272.2  $\Omega$ ) and -20°C (32316  $\Omega$ ) is higher than that at 60°C (15.2  $\Omega$ ), indicating a temperature-sensitive charge transfer of the NiHCF. Although the  $R_{ct}$  is rather high at -20°C, the NiHCF material can still deliver acceptable capacity and rate performance, which may be due to rapid Na-ion diffusion in the open structure of the Prussian material.

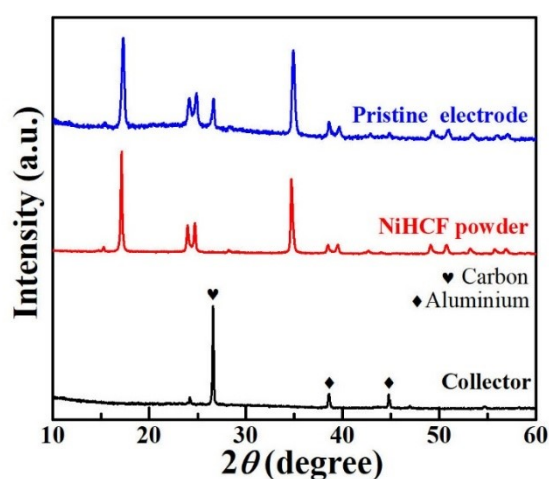

**Fig. S10** XRD patterns of pristine NiHCF electrode, NiHCF powder, and Al current collector.

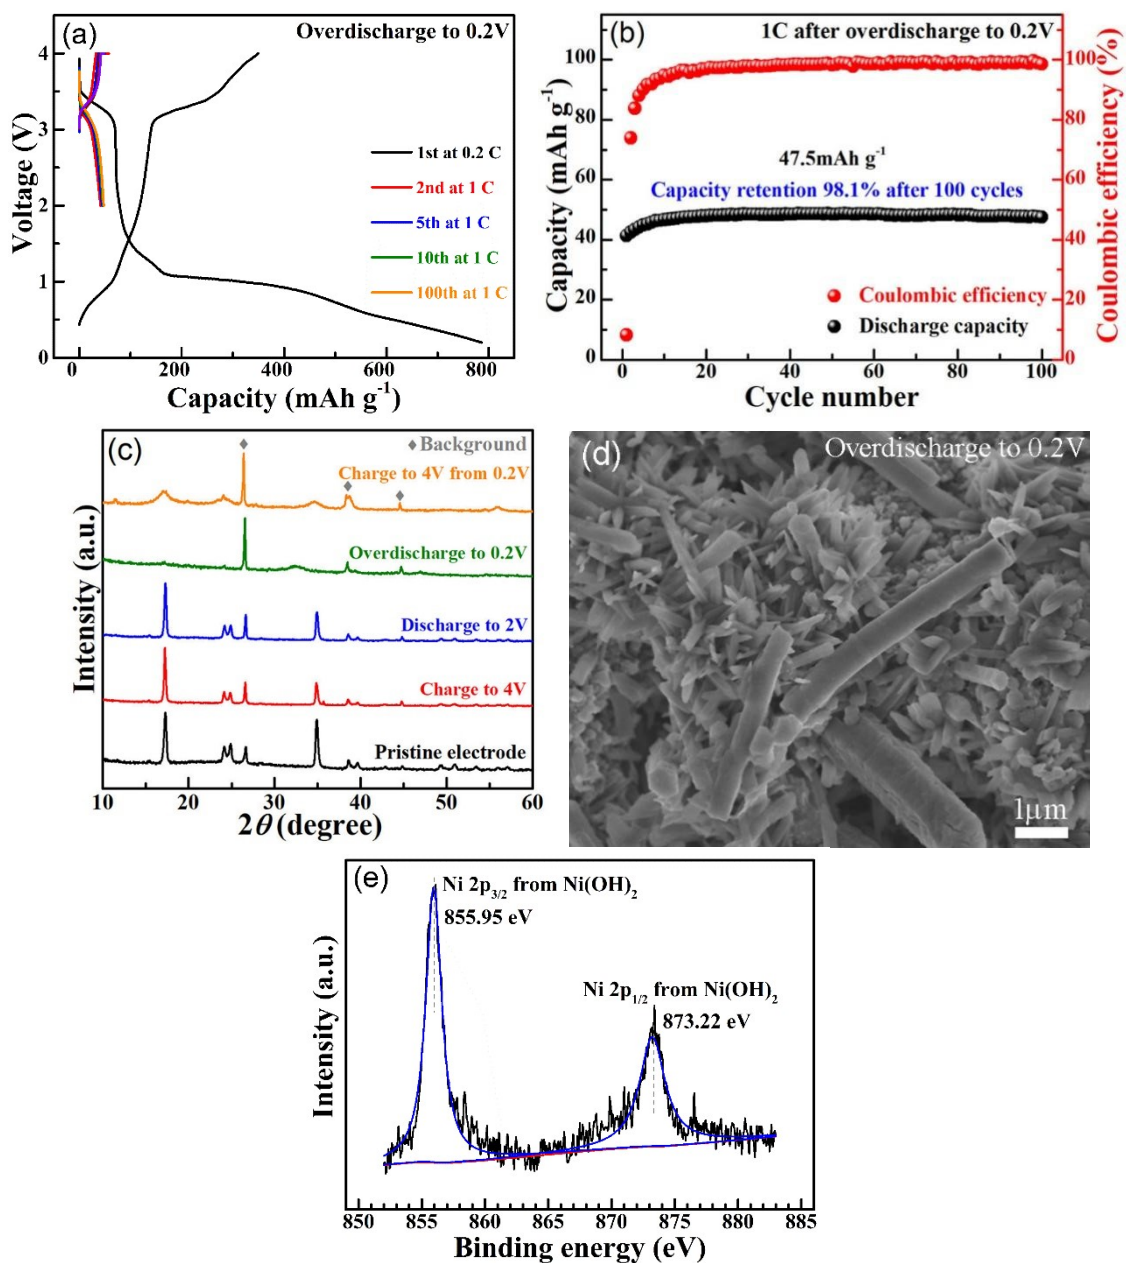

**Fig. S11** (a) Overdischarge (to 0.2 V) tests of the NiHCF, (b) cycling stability of NiHCF at 1 C after overdischarge to 0.2 V, (c) XRD patterns of NiHCF electrodes at different charge/discharge states, and (d) SEM image and (e) Ni XPS spectrum of the NiHCF electrode after overdischarge to 0.2 V.

The deep overdischarge to 0.2 V leads to a high discharge capacity over  $750 \text{ mAh g}^{-1}$ . XRD and SEM indicate the complete crystal and morphology destruction of NiHCF as shown in Fig. S11c in Fig. S11d. XPS spectrum (Fig. S11e) confirms the breaking of the Ni–N bonds with the formation of  $\text{Ni(OH)}_2$ , which may be due to the oxidation of the metallic Ni (reduced from  $\text{Ni}^{2+}$  at deep overdischarge) by trace  $\text{O}_2$  and  $\text{H}_2\text{O}$  in the electrolyte.

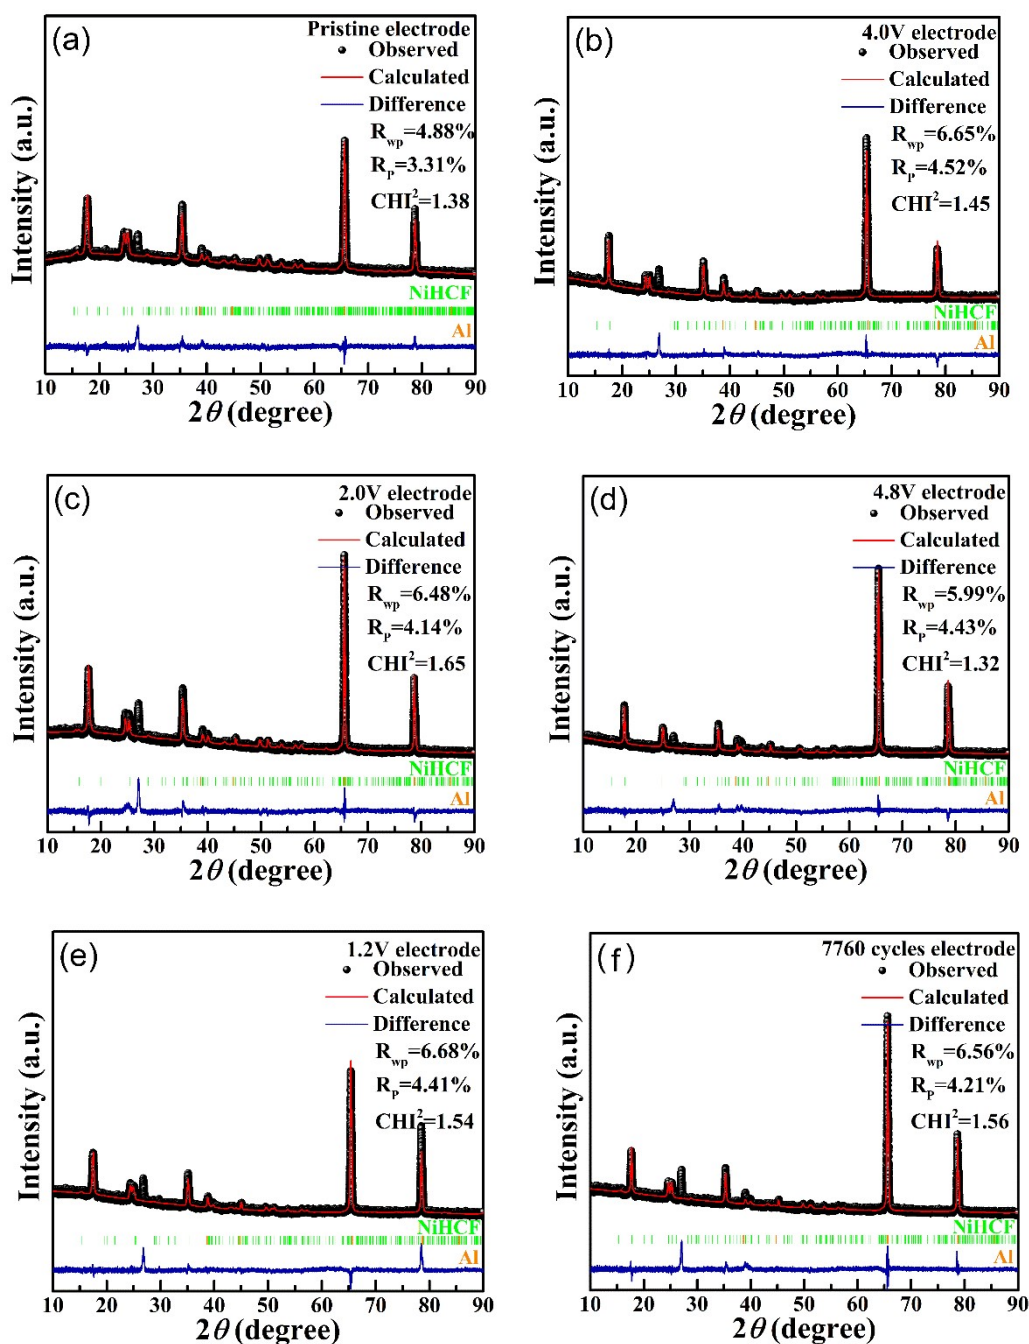

**Fig. S12** Rietveld refinements of (a) pristine NiHCF electrode, (b) NiHCF electrode charged to 4.0 V, (c) NiHCF electrode discharged to 2.0 V, (d) NiHCF electrode overcharged to 4.8 V, (e) NiHCF electrode overdischarged to 1.2 V and (f) NiHCF electrode after 7760 cycles at 5 C at 25°C.

The Rietveld refinements of NiHCF electrode at various states are shown in Fig. S12. We give the lattice parameters from the Rietveld refinements for NiHCF electrodes in Table S7. The lattice parameters of NiHCF show minor changes after overcharge/overdischarge abuse. Even after 7760 cycles, lattice parameter only changes by 0.37%, implying a typical “zero strain” feature.



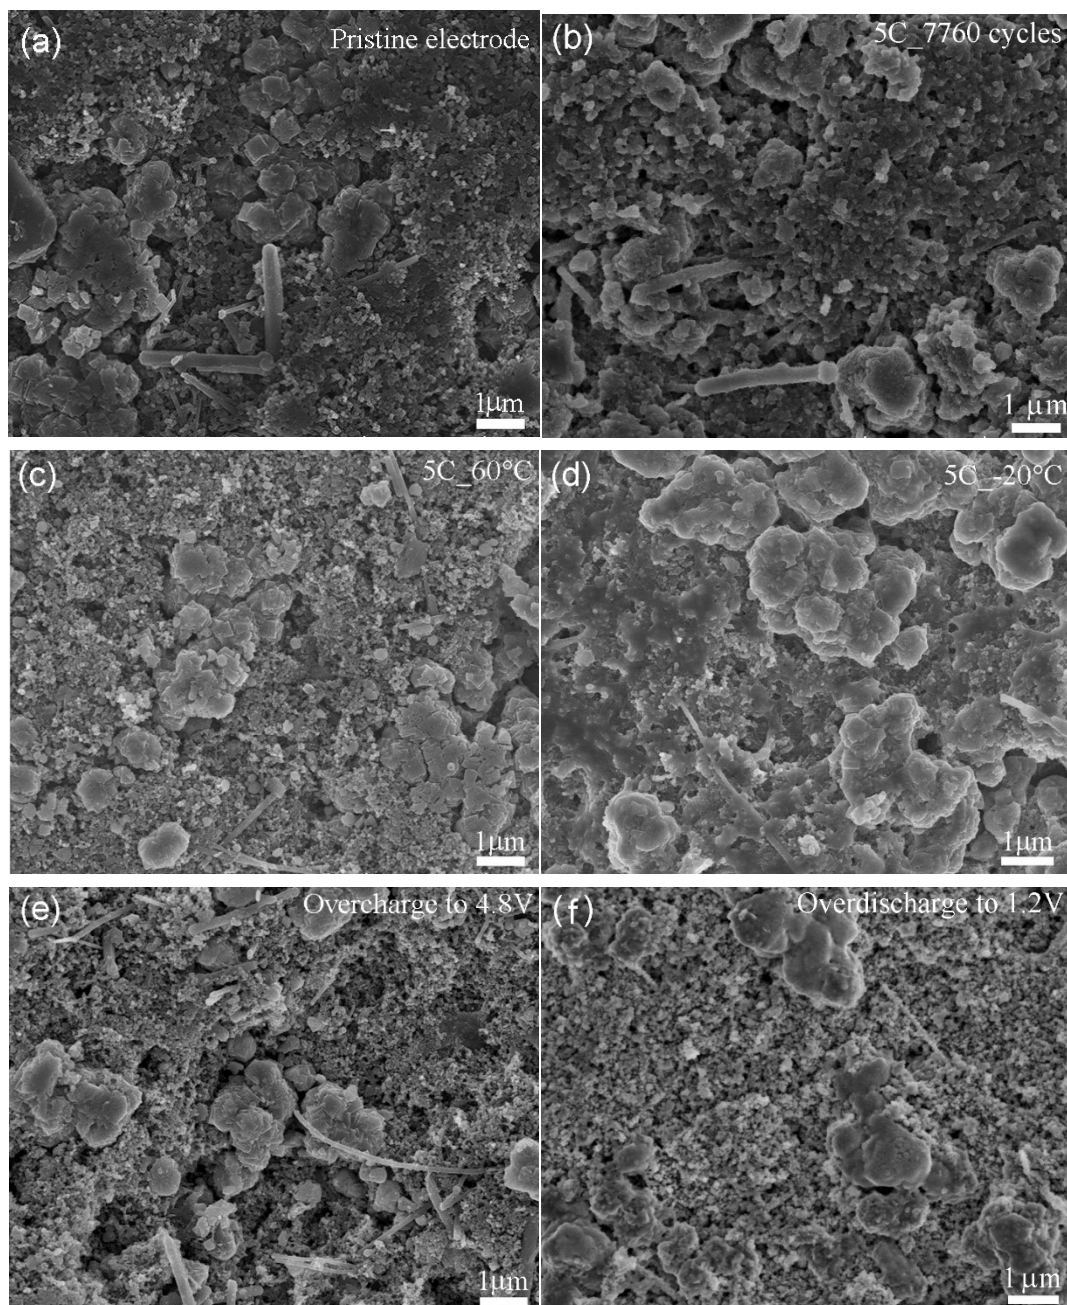

**Fig. S13** SEM images of (a) pristine NiHCF electrode, (b) NiHCF electrode after 7760 cycles at 5 C at 25°C, (c) NiHCF electrode after 500 cycles at 5 C at 60°C, (d) NiHCF electrode after 500 cycles at 5 C at -20°C, (e) NiHCF electrode after 500 cycles at 1 C after recovery from overcharge to 4.8 V, and (f) NiHCF electrode after 500 cycles at 1 C after recovery from overdischarge to 1.2 V.

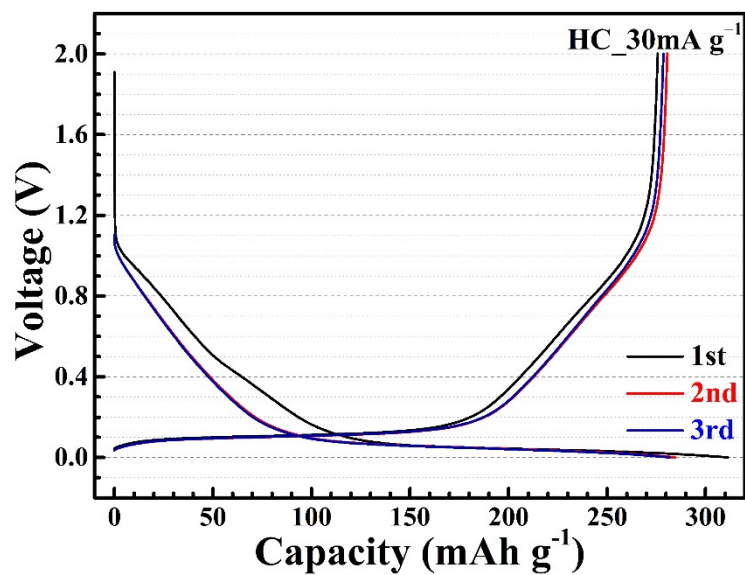

Fig. S14 Voltage profiles of hard carbon at 30 mA g<sup>-1</sup>

The hard carbon demonstrates an operating voltage around 0.1 V, a reversible capacity about 275 mAh g<sup>-1</sup>, and an initial coulombic efficiency close to 88%.

## Information for Videos

**Video 1:** Synthesis of NiHCF using a 100 L reactor.

**Video 2:** The NiHCF/HC battery powers a toy car.

**Table S1** Lattice parameters from the Rietveld refinements.

| Lattice parameters<br>of NiHCF | $a / \text{\AA}$ | $b / \text{\AA}$ | $c / \text{\AA}$ | $\alpha / ^\circ$ | $\beta / ^\circ$ | $\gamma / ^\circ$ | $V / 10^6$<br>$\text{pm}^3$ |
|--------------------------------|------------------|------------------|------------------|-------------------|------------------|-------------------|-----------------------------|
|                                | 7.167            | 7.396            | 12.301           | 90.000            | 123.283          | 90.000            | 545.133                     |

**Table S2** Atomic coordinates for Monoclinic NiHCF.

| Atom | Wyck. | SOF      | $x$    | $y$    | $z$    | $B / 10^4$<br>$\text{pm}^2$ |
|------|-------|----------|--------|--------|--------|-----------------------------|
| Ni1  | 2a    | 0.747277 | 0      | 0      | 0      | 2.921402                    |
| Fe   | 2d    | 0.813703 | 0.5    | 0      | 0.5    | 2.921402                    |
| C1   | 4e    | 0.539412 | 0.7041 | 0.319  | 0.0126 | 3.868883                    |
| C2   | 4e    | 0.769545 | 0.3232 | 0.0115 | 0.3131 | 3.868883                    |
| C3   | 4e    | 0.733218 | 0.3145 | 0.3152 | 0.004  | 3.868883                    |
| N1   | 4e    | 0.932472 | 0.8036 | 0.2031 | 0.0098 | 3.868883                    |
| N2   | 4e    | 0.931235 | 0.2117 | 0.0068 | 0.204  | 3.868883                    |
| N3   | 4e    | 0.829527 | 0.2059 | 0.2056 | 0.0031 | 3.868883                    |
| O1   | 4e    | 0.882312 | 0.0246 | 0.7252 | 0.261  | 3.868883                    |
| Na   | 4e    | 0.55     | 0.268  | 0.4554 | 0.2658 | 5.605933                    |

**Table S3** ICP results of NiHCF.

| Elements | Test<br>s | Weight<br>(mg<br>$\text{L}^{-1}$ ) | Atom<br>(mol<br>$\text{mL}^{-1}$ ) | Normalized |
|----------|-----------|------------------------------------|------------------------------------|------------|
| Na       | 1         | 3.356                              | 0.146                              | 2.224      |
|          | 2         | 3.392                              | 0.147                              | 2.247      |
|          | 3         | 3.319                              | 0.144                              | 2.199      |
| Fe       | 1         | 2.892                              | 0.052                              | 0.789      |
|          | 2         | 2.970                              | 0.053                              | 0.811      |
|          | 3         | 3.000                              | 0.054                              | 0.819      |
| Ni       | 1         | 3.902                              | 0.066                              | 1.013      |
|          | 2         | 3.851                              | 0.066                              | 1.000      |
|          | 3         | 3.903                              | 0.067                              | 1.014      |

**Table S4** Electrochemical performance of NiHCF at 1 C from -40 to 80°C.

| Temperature | Discharge capacity<br>(mAh g <sup>-1</sup> ) | Coulombic<br>efficiency (%) | Operate<br>voltage (V) | Theoretical<br>energy density<br>(Wh kg <sup>-1</sup> ) |
|-------------|----------------------------------------------|-----------------------------|------------------------|---------------------------------------------------------|
| 80°C        | 80.1                                         | 48.93                       | 3.11                   | 243.2                                                   |
| 70°C        | 77.8                                         | 82.20                       | 3.12                   | 239.5                                                   |
| 60°C        | 81.6                                         | 97.41                       | 3.22                   | 259.5                                                   |
| 50°C        | 79.8                                         | 98.32                       | 3.24                   | 256.0                                                   |
| 40°C        | 78.5                                         | 98.61                       | 3.22                   | 250.9                                                   |
| 30°C        | 77.8                                         | 99.02                       | 3.22                   | 248.1                                                   |
| 25°C        | 74.2                                         | 99.88                       | 3.27                   | 240.3                                                   |
| 20°C        | 72.9                                         | 99.91                       | 3.29                   | 236.8                                                   |
| 10°C        | 71.6                                         | 99.93                       | 3.27                   | 230.7                                                   |
| 0°C         | 69.6                                         | 99.96                       | 3.23                   | 221.8                                                   |
| -10°C       | 66.4                                         | 99.99                       | 3.15                   | 206.0                                                   |
| -20°C       | 63.1                                         | 100                         | 3.04                   | 188.8                                                   |
| -30°C       | 55.5                                         | 99.85                       | 2.88                   | 158.1                                                   |
| -40°C       | 41.8                                         | 99.56                       | 2.71                   | 112.0                                                   |

**Table S5** Rate capability of NiHCF at 25°C, 60°C and –20°C.

| <b>Temperature</b> | <b>Discharge rate</b>                      | <b>0.2 C</b> | <b>0.5 C</b> | <b>1 C</b> | <b>2 C</b> | <b>5 C</b> | <b>10 C</b> | <b>20 C</b> | <b>50 C</b> |
|--------------------|--------------------------------------------|--------------|--------------|------------|------------|------------|-------------|-------------|-------------|
| <b>25°C</b>        | <b>Capacity (mAh g<sup>-1</sup>)</b>       | 76.4         | 74.4         | 74.2       | 74.2       | 73.3       | 71.9        | 69.1        | 59.7        |
|                    | <b>Capacity retention (%)</b>              | 100.0        | 97.4         | 97.2       | 97.1       | 96.1       | 94.2        | 90.5        | 78.2        |
|                    | <b>Operation voltage (V)</b>               | 3.32         | 3.3          | 3.27       | 3.23       | 3.13       | 3.06        | 2.96        | 2.79        |
|                    | <b>Voltage retention (%)</b>               | 100.0        | 99.4         | 98.5       | 97.3       | 94.3       | 92.2        | 89.2        | 84.1        |
|                    | <b>Polarization voltage (V)</b>            | 0            | 0.02         | 0.05       | 0.09       | 0.19       | 0.26        | 0.36        | 0.53        |
|                    | <b>Energy density (Wh kg<sup>-1</sup>)</b> | 249.5        | 242.9        | 240.3      | 236.9      | 227.8      | 216.2       | 200.4       | 161.6       |
|                    | <b>Energy retention (%)</b>                | 100.0        | 97.4         | 96.3       | 94.9       | 91.3       | 86.7        | 80.3        | 64.8        |
| <b>60°C</b>        | <b>Capacity (mAh g<sup>-1</sup>)</b>       | 84.0         | 80.5         | 78.1       | 77.1       | 77.5       | 76.1        | 75.7        | 74.0        |
|                    | <b>Capacity retention (%)</b>              | 110.1        | 105.4        | 102.4      | 100.9      | 101.6      | 99.8        | 99.2        | 97.0        |
|                    | <b>Operation voltage (V)</b>               | 3.23         | 3.17         | 3.17       | 3.15       | 3.13       | 3.10        | 3.04        | 2.93        |
|                    | <b>Voltage retention (%)</b>               | 97.3         | 95.5         | 95.4       | 95.0       | 94.2       | 93.3        | 91.7        | 88.4        |
|                    | <b>Polarization voltage (V)</b>            | 0.09         | 0.15         | 0.15       | 0.17       | 0.19       | 0.22        | 0.28        | 0.39        |
|                    | <b>Energy density (Wh kg<sup>-1</sup>)</b> | 268.1        | 253.4        | 244.5      | 240.5      | 239.5      | 232.5       | 226.4       | 211.2       |
|                    | <b>Energy retention (%)</b>                | 107.5        | 101.6        | 98.0       | 96.4       | 96.0       | 93.2        | 90.8        | 84.7        |
| <b>–20°C</b>       | <b>Capacity (mAh g<sup>-1</sup>)</b>       | 69.4         | 66.1         | 66.9       | 65.3       | 61.4       | 56.5        | 49.7        | 35.8        |
|                    | <b>Capacity retention (%)</b>              | 90.9         | 86.6         | 87.7       | 85.6       | 80.4       | 74.0        | 65.1        | 46.9        |
|                    | <b>Operation voltage (V)</b>               | 3.19         | 3.14         | 3.11       | 2.98       | 2.88       | 2.80        | 2.69        | 2.29        |
|                    | <b>Voltage retention (%)</b>               | 96.1         | 94.5         | 93.7       | 89.9       | 86.7       | 84.4        | 81.0        | 69.0        |
|                    | <b>Polarization voltage (V)</b>            | 0.13         | 0.18         | 0.21       | 0.34       | 0.44       | 0.52        | 0.63        | 1.03        |
|                    | <b>Energy density (Wh kg<sup>-1</sup>)</b> | 220.2        | 205.5        | 206.3      | 193.8      | 175.0      | 155.3       | 130.1       | 80.3        |
|                    | <b>Energy retention (%)</b>                | 88.3         | 82.4         | 82.7       | 77.7       | 70.2       | 62.3        | 52.2        | 32.2        |

Notes: voltage retention is percentage of the operation voltage at 0.2 C at 25°C, polarization voltage is the difference with the operation voltage at 0.2 C at 25°C, energy density is the theoretical energy density for NiHCF material, and energy retention is percentage of the energy retention at 0.2 C at 25°C.

**Table S6** EIS fitting results of NiHCF at different temperatures.

| Sample | $R_{el}/\Omega$ | $R_{ct}/\Omega$ | $Q_{dl}$             |      | $R$   | $W$   |      |
|--------|-----------------|-----------------|----------------------|------|-------|-------|------|
|        |                 |                 | $Y$                  | $n$  |       | $T$   | $P$  |
| 60°C   | 7.1             | 15.2            | $5.5\times 10^{-6}$  | 0.91 | 3.2   | 0.033 | 0.48 |
| 25°C   | 11.8            | 272.2           | $6.1\times 10^{-6}$  | 0.89 | 0.18  | 0.001 | 0.46 |
| -20°C  | 73.5            | 32316           | $3.89\times 10^{-6}$ | 0.89 | 14692 | 70.4  | 0.72 |

**Table S7** Lattice parameters from the Rietveld refinements.

| Lattice parameters                  | Pristine     | Charged to 4  | Discharged to 2 | Charged to 4.8 | Discharged to 1.2 | 7760 cycles  |
|-------------------------------------|--------------|---------------|-----------------|----------------|-------------------|--------------|
|                                     |              | V             | V               | V              | V                 |              |
| $a/\text{\AA}$                      | 7.1608       | 7.1920        | 7.1993          | 7.1786         | 7.2257            | 7.1798       |
| $b/\text{\AA}$                      | 7.4144       | 7.3887        | 7.4175          | 7.3941         | 7.3134            | 7.4140       |
| $c/\text{\AA}$                      | 12.3609      | 12.3512       | 12.3240         | 12.4642        | 12.5490           | 12.4115      |
| $\alpha/^\circ$                     | 90           | 90            | 90              | 90             | 90                | 90           |
| $\beta/^\circ$                      | 123.2803     | 123.3346      | 123.4323        | 123.6694       | 124.8551          | 123.5396     |
| $\gamma/^\circ$                     | 90           | 90            | 90              | 90             | 90                | 90           |
| $V/10^6\text{ pm}^3$                | 548.6416     | 548.3526      | 549.2198        | 550.6126       | 544.1820          | 550.6732     |
| $V$ difference / $10^6\text{ pm}^3$ | 0.0000       | 0.2890        | 0.5782          | 1.9710         | 4.4596            | 2.0316       |
| <b>Variance ratio</b>               | <b>0.00%</b> | <b>-0.05%</b> | <b>0.11%</b>    | <b>0.36%</b>   | <b>-0.81%</b>     | <b>0.37%</b> |

**Table S8.** Comparison of cycling performance of PBAs.

| <b>Material</b>       | <b>Temperature (°C)</b> | <b>Current density (mA g<sup>-1</sup>)</b> | <b>Initial capacity (mAh g<sup>-1</sup>)</b> | <b>Cycle number</b> | <b>Final capacity (mAh g<sup>-1</sup>)</b> | <b>Capacity retention</b> | <b>Reference</b> |
|-----------------------|-------------------------|--------------------------------------------|----------------------------------------------|---------------------|--------------------------------------------|---------------------------|------------------|
| <b>NiHCF</b>          | <b>25</b>               | <b>1700</b>                                | <b>68.5</b>                                  | <b>16000</b>        | 61.9                                       | <b>90.4%</b>              | <b>This work</b> |
| <b>NiHCF</b>          | <b>25</b>               | <b>850</b>                                 | <b>73.2</b>                                  | <b>8000</b>         | 72.5                                       | <b>99.1%</b>              | <b>This work</b> |
| NiHCF-3               | 25                      | 170                                        | ~76                                          | 800                 | 68.4                                       | 90%                       | [1]              |
| NiHCF-3               | 25                      | 300                                        | ~76                                          | 1200                | ~75                                        | 99.5%                     | [2]              |
| HQ-NiHCF              | 25                      | 170                                        | 78                                           | 1200                | 76.4                                       | 98%                       | [3]              |
| NiHCF-cube            | 25                      | 495                                        | ~65                                          | 5000                | 50.0                                       | 76.9%                     | [4]              |
| NiHCF-etch            | 25                      | 495                                        | ~82                                          | 5000                | 68.2                                       | 83.2%                     | [4]              |
| <b>NiHCF</b>          | <b>25</b>               | <b>425</b>                                 | <b>73.8</b>                                  | <b>6200</b>         | 72.2                                       | <b>97.8%</b>              | <b>This work</b> |
| <b>NiHCF</b>          | <b>60</b>               | <b>425</b>                                 | <b>71.9</b>                                  | <b>600</b>          | 68.7                                       | <b>95.5%</b>              | <b>This work</b> |
| <b>NiHCF</b>          | <b>-20</b>              | <b>425</b>                                 | <b>64.6</b>                                  | <b>1800</b>         | 59.4                                       | <b>91.9%</b>              | <b>This work</b> |
| PBNi-ES               | 25                      | 85                                         | 82.7                                         | 440                 | 72.0                                       | 87%                       | [5]              |
| PBNi-ES               | 0                       | 85                                         | 79.3                                         | 440                 | 69.0                                       | 87%                       | [5]              |
| PBNi-ES               | -25                     | 85                                         | 64.3                                         | 440                 | 54.0                                       | 84%                       | [5]              |
| PBFe/CNT              | 25                      | 2.4C                                       | 114                                          | 1000                | 92.3                                       | 81%                       | [6]              |
| PBFe/CNT              | 0                       | 2.4C                                       | 114                                          | 1000                | 92.3                                       | 81%                       | [6]              |
| PBFe/CNT              | -25                     | 2.4C                                       | 88.4                                         | 1000                | 76.0                                       | 86%                       | [6]              |
| PBFe                  | 55                      | 100                                        | 120.5                                        | 200                 | 65.9                                       | 54.7%                     | [7]              |
| PBFe                  | 25                      | 100                                        | 100.0                                        | 300                 | 98.2                                       | 98.2%                     | [7]              |
| PBFe                  | -10                     | 100                                        | 83.7                                         | 200                 | 83.6                                       | 99.8%                     | [7]              |
| <b>NiHCF//Zn cell</b> | <b>25</b>               | <b>400</b>                                 | <b>61.8</b>                                  | <b>3100</b>         | 52.0                                       | <b>84.1%</b>              | <b>This work</b> |
| NiHCF//Zn cell        | 25                      | 500                                        | ~56                                          | 1000                | ~45                                        | 81%                       | [8]              |
| NiHCF//Zn cell        | 25                      | 500                                        | ~68                                          | 1000                | ~61                                        | 91%                       | [9]              |

**Table S9.** Comparison of rate capability of NiHCF.

| <b>Material</b>       | <b>Temperature (°C)</b> | <b>Current density (mA g<sup>-1</sup>)</b> | <b>Initial capacity (mAh g<sup>-1</sup>)</b> | <b>Cycle number</b> | <b>Final capacity (mAh g<sup>-1</sup>)</b> | <b>Capacity retention</b> | <b>Reference</b> |
|-----------------------|-------------------------|--------------------------------------------|----------------------------------------------|---------------------|--------------------------------------------|---------------------------|------------------|
| <b>NiHCF</b>          | <b>25</b>               | <b>17</b>                                  | <b>76.4</b>                                  | <b>4250</b>         | 59.7                                       | <b>78.2%</b>              | <b>This work</b> |
| <b>NiHCF</b>          | <b>60</b>               | <b>17</b>                                  | <b>84.0</b>                                  | <b>4250</b>         | 74.0                                       | <b>88.1%</b>              | <b>This work</b> |
| <b>NiHCF</b>          | <b>-20</b>              | <b>17</b>                                  | <b>69.4</b>                                  | <b>4250</b>         | 35.8                                       | <b>51.6%</b>              | <b>This work</b> |
| NiHCF-3               | 25                      | 17                                         | 86.3                                         | <b>4250</b>         | 64.4                                       | 74.6%                     | [1]              |
| NiHCF-3               | 25                      | 17                                         | 85.7                                         | <b>4250</b>         | 66.8                                       | 78.0%                     | [2]              |
| HQ-NiHCF              | 25                      | 15                                         | 80                                           | 750                 | 62.0                                       | 77.5%                     | [3]              |
| NiHCF-etch            | 25                      | 100                                        | 90                                           | 4000                | 71.0                                       | 78.8%                     | [4]              |
| PBNi-ES               | 25                      | 8.5                                        | 80.3                                         | 2125                | 56.0                                       | 69.7%                     | [5]              |
| PBNi-ES               | 0                       | 42.5                                       | 74.0                                         | 425                 | 58.5                                       | 79.1%                     | [5]              |
| PBNi-ES               | -25                     | 42.5                                       | 62.0                                         | 425                 | 16.3                                       | 26.3%                     | [5]              |
| <b>NiHCF//Zn cell</b> | <b>25</b>               | <b>16</b>                                  | <b>69.0</b>                                  | <b>4000</b>         | 41.0                                       | <b>59.4%</b>              | <b>This work</b> |
| NiHCF//Zn cell        | 25                      | 100                                        | ~76                                          | 1000                | ~44.0                                      | 58%                       | [8]              |
| NiHCF//Zn cell        | 25                      | 100                                        | 84.8                                         | 4000                | 70.4                                       | 83%                       | [9]              |

## References

- 1 Y. Xu, M. Chang, C. Fang, Y. Liu, Y. G. Qiu, M. Y. Ou, J. Peng, P. Wei, Z. Deng, S. X. Sun, X. P. Sun, Q. Li, J. T. Han and Y. H. Huang, *ACS Appl. Mater. Interfaces*, 2019, **11**, 29985–29992.
- 2 Y. Xu, J. Wan, L. Huang, M. Y. Ou, C. Y. Fan, P. Wei, J. Peng, Y. Liu, Y. G. Qiu, X. P. Sun, C. Fang, Q. Li, J. T. Han, Y. H. Huang, J. A. Alonso and Y. S. Zhao, *Adv. Energy Mater.*, 2019, **9**, 1803158.
- 3 R. Rehman, J. Peng, H. C. Yi, Y. Shen, J. W. Yin, C. Li, C. Fang, Q. Li and J. T. Han, *RSC Adv.*, 2020, **10**, 27033–27041.
- 4 W. H. Ren, M. S. Qin, Z. X. Zhu, M. Y. Yan, Q. Li, L. Zhang, D. N. Liu and L. Q. Mai, *Nano Lett.*, 2017, **17**, 4713–4718.
- 5 X. H. Ma, Y. Y. Wei, Y. D. Wu, J. Wang, W. Jia, J. H. Zhou, Z. F. Zi and J. M. Dai, *Electrochim. Acta*, 2019, **297**, 392–397.
- 6 Y. You, H. R. Yao, S. Xin, Y. X. Yin, T. T. Zuo, C. P. Yang, Y. G. Guo, Y. Cui, L. J. Wan and J. B. Goodenough, *Adv. Mater.*, 2016, **28**, 7243–7248.
- 7 X. M. Yan, Y. Yang, E. S. Liu, L. Q. Sun, H. Wang, X. Z. Liao, Y. S. He and Z. F. Ma, *Electrochim. Acta*, 2017, **225**, 235–242.
- 8 K. Lu, B. Song, J. T. Zhang and H. Y. Ma, *J. Power Sources*, 2016, **321**, 257–263.
- 9 F. X. Ma, X. H. Yuan, T. Xu, S. Y. Zhou, X. S. Xiong, Q. Zhou, N. F. Yu, J. L. Ye, Y. P. Wu and T. van Ree, *Energy Fuels*, 2020, **34**, 13104 – 13110.
